# Supplementary material
Source: PubMed Central journal article supplement (PMC3140435)
Supplement: NIHMS298227-supplement-Supplementary_Data.pdf [file NIHMS298227-supplement-Supplementary_Data.pdf]

**Copper isotope fractionation during adsorption and intracellular incorporation by bacteria: Isotopic data**

Starting solution for all adsorption experiments  $\delta^{65}\text{Cu} = 0.712 \pm 0.14$  unless otherwise noted

n = number of replicate analyses of the same sample, d = number of column replicates included

All adsorption experiments conducted using a 0.01M  $\text{NaClO}_4$  electrolyte solution.

**Control experiment with 10 mg/L Cu only, no bacteria**

| Sample ID | F precipitated | pH   | $\delta^{65}\text{Cu}$ solution | n | d | 2 sigma |
|-----------|----------------|------|---------------------------------|---|---|---------|
| 21.2      | 0.40           | 6.44 | 1.077                           | 2 |   | 0.105   |
| 21.3      | 0.01           | 3.30 | 0.722                           | 1 | 2 | 0.193   |
| 21.5      | 0.05           | 6.12 | 0.748                           | 1 |   |         |
| 21.7      | 0.03           | 4.49 | 0.673                           | 1 |   |         |
| 21.9      | 0.58           | 6.67 | 1.130                           | 2 |   | 0.112   |
| 21.10.    | 0.94           | 7.31 | -1.308                          | 2 |   | 0.049   |

***E. coli* adsorption vs. pH, 5g/L bacteria, 10 mg/L Cu**

| Sample ID | F adsorbed | pH   | $\delta^{65}\text{Cu}$ solution | n | d | 2 sigma |
|-----------|------------|------|---------------------------------|---|---|---------|
| Cu.8.1.U  | 0.21       | 2.79 | 0.719                           | 1 |   |         |
| Cu.8.3.U  | 0.35       | 3.63 | 1.340                           | 1 |   |         |
| Cu.8.5.U  | 0.39       | 3.91 | 1.307                           | 1 |   |         |
| Cu.8.1.F  | 0.21       | 2.85 | 0.974                           | 1 |   |         |
| Cu.8.3.F  | 0.24       | 2.91 | 1.097                           | 2 | 2 | 0.152   |
| Cu.8.6.F  | 0.84       | 5.61 | 1.580                           | 1 |   |         |
| Cu.8.8.F  | 0.45       | 3.94 | 1.891                           | 2 |   | 0.124   |
| Cu.8.9.F  | 0.88       | 5.90 | 2.009                           | 1 |   |         |
| Cu.8.10.F | 0.43       | 3.22 | 1.524                           | 1 |   |         |

***E. coli* adsorption vs. pH, 15g/L bacteria, 2 mg/L Cu**

| Sample ID | F adsorbed | pH   | $\delta^{65}\text{Cu}$ solution | n | d | 2 sigma |
|-----------|------------|------|---------------------------------|---|---|---------|
| 4B.1.Cu   | 0.95       | 6.45 | 0.943                           | 1 |   |         |
| 4B.2.Cu   | 0.64       | 4.22 | 1.276                           | 1 |   |         |
| 4B.3.Cu   | 0.90       | 5.30 | 1.333                           | 1 |   |         |
| 4B.4.Cu   | 0.93       | 5.03 | 0.770                           | 1 |   |         |
| 4B.5.Cu   | 0.45       | 2.49 | 1.253                           | 1 |   |         |
| 4B.6.Cu   | 0.72       | 3.76 | 0.873                           | 1 |   |         |
| 4B.7.Cu   | 0.80       | 3.96 | 1.565                           | 1 |   |         |

4B.8.Cu                    0.67            3.14            1.703                    1

**B. subtilis adsorption vs. pH, 5g/L bacteria, 10 mg/L Cu**

| Sample ID | F adsorbed | pH   | δ65Cu solution | n | d | 2 sigma |
|-----------|------------|------|----------------|---|---|---------|
| 20.1      | 0.43       | 4.30 | 0.603          | 1 |   |         |
| 20.2      | 0.27       | 2.09 | 0.629          | 1 |   |         |
| 20.3      | 0.27       | 3.15 | 0.932          | 3 | 2 | 0.184   |
| 20.4      | 0.65       | 5.30 | 0.966          | 3 | 2 | 0.164   |
| 20.5      | 0.64       | 6.57 | 1.037          | 2 | 2 | 0.085   |
| 20.6      | 0.43       | 4.44 | 1.171          | 2 |   | 0.145   |
| 20.7      | 0.50       | 4.03 | 0.232          | 1 |   |         |
| 20.8      | 0.17       | 2.90 | 0.704          | 1 |   |         |

**E. coli metal loading experiment, 5g/L bacteria, variable Cu**

| Sample ID    | F adsorbed | pH   | δ65Cu solution | n | d | 2 sigma |
|--------------|------------|------|----------------|---|---|---------|
| 12.1.Cu.Load | 0.43       | 4.00 | 1.046          | 2 |   | 0.070   |
| 12.2.Cu.Load | 0.26       | 4.00 | 1.316          | 2 |   | 0.009   |
| 12.3.Cu.Load | 0.13       | 4.00 | 1.281          | 2 | 2 | 0.289   |

**B. subtilis metal loading experiment, 1g/L bacteria, variable Cu (δ65 of Cu(ClO4)2 starting soln = 0.88‰)**

| Sample ID | F adsorbed | pH   | mg/L Cu added | δ65Cu solution | n | d | 2 sigma |
|-----------|------------|------|---------------|----------------|---|---|---------|
| 31.1      | 0.19       | 4.00 | 4.98          | 1.254          | 1 |   |         |
| 31.2      | 0.14       | 4.00 | 10.09         | 1.462          | 1 |   |         |
| 31.3      | 0.07       | 4.00 | 25.49         | 1.387          | 1 |   |         |

**Heat-killed E. coli adsorption vs. pH, 5g/L bacteria, 10 mg/L Cu(II)**

| Sample ID | F adsorbed | pH   | δ65Cu solution | n | d | 2 sigma |
|-----------|------------|------|----------------|---|---|---------|
| 40.2.Cu   | 0.27       | 2.80 | 0.417          | 2 | 2 | 0.108   |
| 40.3.Cu   | 0.38       | 3.40 | 0.750          | 1 |   |         |
| 40.4.Cu   | 0.45       | 3.90 | 0.851          | 2 |   | 0.372   |
| 40.5.Cu   | 0.44       | 4.00 | 0.816          | 1 |   |         |
| 40.6.Cu   | 0.45       | 4.10 | 0.399          | 2 |   | 0.260   |
| 40.8.Cu   | 0.75       | 5.11 | 0.341          | 2 | 2 | 0.014   |

**48 hour kinetics experiment with E. coli, 5g/L bacteria, 10 mg/L Cu(II)**

| Sample ID | F adsorbed | pH   | sample time (hours) | δ65Cu solution | n | d | 2 sigma |
|-----------|------------|------|---------------------|----------------|---|---|---------|
| 39.1.Cu   | 0.22       | 4.30 | 0.08                | 1.265          | 1 |   |         |
| 39.2.Cu   | 0.23       | 4.30 | 0.08                | 1.361          | 1 |   |         |
| 39.3.Cu   | 0.28       | 4.30 | 0.25                | 1.811          | 1 |   |         |
| 39.4.Cu   | 0.32       | 4.30 | 0.50                | 1.019          | 1 |   |         |
| 39.5.Cu   | 0.36       | 4.30 | 1.00                | 1.370          | 1 |   |         |

|         |      |      |       |       |   |  |       |
|---------|------|------|-------|-------|---|--|-------|
| 39.6.Cu | 0.37 | 4.30 | 1.33  | 1.229 | 1 |  |       |
| 39.7.Cu | 0.52 | 4.30 | 25.00 | 1.325 | 1 |  |       |
| 39.8.Cu | 0.55 | 4.30 | 48.00 | 1.618 | 2 |  | 0.131 |

***E. coli* kinetics and reversibility experiment**  
**5g/L bacteria, 10 mg/L Cu(II)**

| Sample ID    | F adsorbed | pH   | sample time (hours) | $\delta^{65}\text{Cu}$ solution | n | d | 2 sigma |
|--------------|------------|------|---------------------|---------------------------------|---|---|---------|
| 11.1.Cu.Kin  | 0.17       | 4.00 | 0.08                | 0.669                           | 2 | 2 | 0.098   |
| 11.2.Cu.Kin  | 0.18       | 4.00 | 0.08                | 0.981                           | 2 | 2 | 0.150   |
| 11.3.Cu.Kin  | 0.20       | 4.00 | 0.25                | 0.860                           | 2 |   | 0.486   |
| 11.4.Cu.Kin  | 0.19       | 4.00 | 0.28                | 0.762                           | 1 |   |         |
| 11.6.Cu.Kin  | 0.18       | 4.00 | 0.50                | 0.511                           | 2 |   | 0.072   |
| 11.7.Cu.Kin  | 0.21       | 4.00 | 1.00                | 1.478                           | 3 | 2 | 0.063   |
| 11.8.Cu.Kin  | 0.22       | 4.00 | 2.00                | 0.525                           | 2 |   | 0.088   |
| 11.9.Cu.Kin  | 0.20       | 4.00 | 3.00                | 0.948                           | 1 |   |         |
| 11.10.Cu.Kin | 0.44       | 5.00 | 3.12                | 0.903                           | 2 |   | 0.170   |
| 11.11.Cu.Kin | 0.41       | 5.00 | 3.28                | 0.947                           | 1 |   |         |
| 11.12.Cu.Kin | 0.44       | 5.00 | 3.53                | 0.955                           | 1 |   |         |
| 11.14.Cu.Kin | 0.45       | 5.00 | 5.00                | 1.028                           | 1 |   |         |
| 11.15.Cu.Kin | 0.45       | 5.00 | 5.00                | 1.130                           | 1 |   |         |
| 11.16.Cu.Kin | 0.35       | 4.00 | 5.02                | 0.894                           | 2 |   | 0.032   |
| 11.17.Cu.Kin | 0.31       | 4.00 | 5.13                | 0.672                           | 1 |   |         |
| 11.18.Cu.Kin | 0.31       | 4.00 | 5.45                | 1.203                           | 1 |   |         |
| 11.19.Cu.Kin | 0.29       | 4.00 | 5.55                | 1.373                           | 1 |   |         |
| 11.20.Cu.Kin | 0.28       | 4.00 | 5.55                | 0.862                           | 1 |   |         |
| 11.21.Cu.Kin | 0.29       | 4.00 | 6.00                | 0.988                           | 1 |   |         |
| 11.22.Cu.Kin | 0.29       | 4.00 | 6.50                | 0.652                           | 1 |   |         |
| 11.23.Cu.Kin | 0.35       | 4.00 | 24.00               | 1.179                           | 1 |   |         |

***B. subtilis* kinetics and reversibility experiment**  
**bacteria, 10 mg/L Cu(II)**

5g/L

| Sample ID | F adsorbed | pH   | sample time (hours) | $\delta^{65}\text{Cu}$ solution | n | d | 2 sigma |
|-----------|------------|------|---------------------|---------------------------------|---|---|---------|
| 30.1      | 0.42       | 3.93 | 0.08                | 1.034                           | 1 |   |         |
| 30.2      | 0.43       | 3.93 | 0.42                | 1.140                           | 1 |   |         |
| 30.3      | 0.43       | 3.90 | 0.87                | 1.263                           | 2 | 2 | 0.047   |
| 30.4      | 0.43       | 3.89 | 1.00                | 1.065                           | 1 |   |         |
| 30.5      | 0.72       | 4.96 | 1.08                | 1.332                           | 1 |   |         |
| 30.6      | 0.72       | 4.80 | 1.18                | 1.452                           | 1 |   |         |
| 30.7      | 0.73       | 5.05 | 1.87                | 1.622                           | 2 | 2 | 0.190   |

|        |      |      |      |       |   |       |
|--------|------|------|------|-------|---|-------|
| 30.8   | 0.65 | 4.60 | 3.00 | 1.267 | 1 |       |
| 30.9   | 0.41 | 3.90 | 3.03 | 1.236 | 1 |       |
| 30.10. | 0.45 | 3.90 | 3.13 | 1.351 | 2 | 0.127 |

**Starting solution (Cu-citrate) for all intracellular incorporation experiments**

**$\delta^{65}\text{Cu} = -0.451 \pm 0.122$**

| <b><i>E. coli</i> intracellular Cu</b>                 |            |      |                              |   |       |
|--------------------------------------------------------|------------|------|------------------------------|---|-------|
|                                                        | F Cu SOLID | pH   | $\delta^{65}\text{Cu}$ SOLID | n |       |
| EC 1                                                   | 0.01       | 7.00 | -3.045                       | 1 |       |
| EC 2                                                   | 0.02       | 7.00 | -2.493                       | 1 |       |
| <b><i>B. subtilis</i> intracellular Cu</b>             |            |      |                              |   |       |
|                                                        | F Cu SOLID | pH   | $\delta^{65}\text{Cu}$ SOLID | n |       |
| BS 1                                                   | 0.01       | 7.00 | -1.680                       | 1 |       |
| BS 2                                                   | 0.02       | 7.00 | -1.658                       | 1 |       |
| <b>Rio Grande Reservoir consortia intracellular Cu</b> |            |      |                              |   |       |
|                                                        | F Cu SOLID | pH   | $\delta^{65}\text{Cu}$ SOLID | n |       |
| RGB 1                                                  | 0.40       | 7.00 | -3.085                       | 1 |       |
| <b>Cement Creek consortia intracellular Cu</b>         |            |      |                              |   |       |
|                                                        | F Cu SOLID | pH   | $\delta^{65}\text{Cu}$ SOLID | n |       |
| NB 9/24 2                                              | 0.13       | 7.00 | -2.222                       | 2 | 0.027 |
| NB 9/26 1                                              | 0.27       | 7.00 | -1.804                       | 1 |       |

| <b>Atomic adsorption standard</b>  |    |   |                        |         |  |
|------------------------------------|----|---|------------------------|---------|--|
|                                    | n  | d | $\delta^{65}\text{Cu}$ | 2 sigma |  |
| AA std                             | 15 | 5 | 0.712                  | 0.140   |  |
| <b>Copper rod standard</b>         |    |   |                        |         |  |
|                                    | n  | d | $\delta^{65}\text{Cu}$ | 2 sigma |  |
| Cu ROD                             | 12 | 3 | 0.716                  | 0.166   |  |
| <b>Copper-citrate</b>              |    |   |                        |         |  |
|                                    | n  | d | $\delta^{65}\text{Cu}$ | 2 sigma |  |
| Cu-citrate                         | 4  | 2 | -0.451                 | 0.122   |  |
| <b>Copper perchlorate</b>          |    |   |                        |         |  |
|                                    | n  | d | $\delta^{65}\text{Cu}$ | 2 sigma |  |
| Cu(ClO <sub>4</sub> ) <sub>2</sub> | 3  |   | 0.883                  | 0.139   |  |
